# Supplementary material for: Completeness of preventive therapy for tuberculosis in indigenous versus nonindigenous populations in the Brazilian Amazon: a retrospective cohort study
Source: Research Square preprint supplement (doi:10.21203/rs.3.rs-6811654/v1), 2025-06-11
Supplement: Supplementary file 1 [file 1062e2f2447f0eacd90f2462.docx]

**Table Supplementary 1:** All Characteristics of the cases notified by TPT in the IL-TB System stratified according to race

|  | [ALL] | aNonindigenous | Indigenous | bp.overall |
| --- | --- | --- | --- | --- |
| Characteristics | 4887  (N;%) | 4666  (N;%) | 221  (N;%) |  |
| Sex: |  |  |  | 0.048 |
| Female | 2451 (50.2) | 2355 (50.5) | 96(43.4) |  |
| Male | 2436 (49.8) | 2311 (49.5) | 125 (56.6) |  |
| Age (y, median, IQR) | 35.0  [21.0;49.0] | 36.0  [22.0;50.0] | 32.0 [20.0;46.0] | 0.059 |
| Age group (y): |  |  |  | 0.014 |
| < 20 | 1103 (22.6) | 1050 (22.5) | 53 (24.0) |  |
| 20-39 | 1684 (34.5) | 1591 (34.1) | 93 (42.1) |  |
| >= 40 | 2100 (43.0) | 2025 (43.4) | 75 (33.9) |  |
| Nationality: |  |  |  | <0.001 |
| Brazilian | 4785 (97.9) | 4587 (98.3) | 198 (89.6) |  |
| Foreign | 102 (2.09) | 79 (1.69) | 23 (10.4) |  |
| State of residence: |  |  |  | 1.000 |
| Amazonas | 4883 (99.9) | 4662 (99.9) | 221 (100) |  |
| Pará | 2 (0.04) | 2 (0.04) | . |  |
| Rio Grande do Sul | 1 (0.02) | 1 (0.02) | . |  |
| São Paulo | 1 (0.02) | 1 (0.02) | . |  |
| Municipality of residence: |  |  |  | <0.001 |
| Manaus | 4243 (86.9) | 4144 (88.9) | 99 (44.8) |  |
| Others | 642 (13.1) | 520 (11.1) | 122 (55.2) |  |
| BCG vaccinated: |  |  |  | 0.033 |
| Yes | 4239 (86.7) | 4050 (86.8) | 189 (85.5) |  |
| Not | 378 (7.73) | 366 (7.84) | 12 (5.43) |  |
| Ignored | 270 (5.52) | 250 (5.36) | 20 (9.05) |  |
| History of contact with TB cases |  |  |  | <0.001 |
| Yes | 2888 (59.1) | 2693 (57.7) | 195 (88.2) |  |
| Not | 1330 (27.2) | 1312 (28.1) | 18 (8.14) |  |
| Don’t know | 523 (10.7) | 517 (11.1) | 6 (2.71) |  |
| Ignored | 146 (2.99) | 144 (3.09) | 2 (0.90) |  |
| Performed TST: |  |  |  | <0.001 |
| Yes | 3892 (79.6) | 3688 (79.0) | 204 (92.3) |  |
| Not | 995 (20.4) | 978 (21.0) | 17 (7.69) |  |
| Result of the last TST (mm, median, IQR) | 12.0  [9.00;16.0] | 12.0  [9.00;16.0] | 12.0 [8.00;15.0] | 0.220 |
| Result of IGRA: |  |  |  | 0.061 |
| Positive | 459 (9.39) | 448 (9.60) | 11 (4.98) |  |
| Negative | 41 (0.84) | 39 (0.84) | 2 (0.90) |  |
| Indeterminate | 12 (0.25) | 11 (0.24) | 1 (0.45) |  |
| Not performed | 4375 (89.5) | 4168 (89.3) | 207 (93.7) |  |
| Result of X-ray: |  |  |  | <0.001 |
| Normal | 4489 (91.9) | 4302 (92.2) | 187 (84.6) |  |
| Change not suggestive of active TB | 337 (6.90) | 312 (6.69) | 25 (11.3) |  |
| Change suggestive of active TB | 9 (0.18) | 9 (0.19) | . |  |
| Not performed | 52 (1.06) | 43 (0.92) | 9 (4.07) |  |
| HIV test result: |  |  |  | <0.001 |
| Positive | 1197 (24.5) | 1184 (25.4) | 13 (5.88) |  |
| Negative | 1620 (33.1) | 1498 (32.1) | 122 (55.2) |  |
| Not performed | 2070 (42.4) | 1984 (42.5) | 86 (38.9) |  |
| PVHIV on ART: |  |  |  | 1.000 |
| Yes | 573 (93.8) | 566 (93.7) | 7 (100) |  |
| Not | 28 (4.58) | 28 (4.64) | . |  |
| Ignored | 10 (1.64) | 10 (1.66) | . |  |
| Active TB discarded: |  |  |  | 1.000 |
| Yes | 4880 (99.9) | 4659 (99.8) | 221 (100) |  |
| Not | 7 (0.14) | 7 (0.15) | . |  |
| TPT Indication Category: |  |  |  | . |
| TB Case Contact Person | 2734 (55.9) | 2541 (54.5) | 193 (87.3) |  |
| PVHIV with cd4 =< 350 cel/mm3 | 727 (14.9) | 720 (15.4) | 7 (3.17) |  |
| PVHIV with cd4 > 350 cel/mm3 | 562 (11.5) | 557 (11.9) | 5 (2.26) |  |
| People in a situation of immunosuppression | 527 (10.8) | 526 (11.3) | 1 (0.45) |  |
| Other indications | 333 (6.81) | 318 (6.82) | 15 (6.79) |  |
| Person on dialysis therapy | 4 (0.08) | 4 (0.09) | . |  |
| TPT Treatment Regimen: |  |  |  | 0.206 |
| Isoniazid – 6H/9H/12H | 1932 (39.5) | 1842 (39.5) | 90 (40.7) |  |
| Isoniazid - 6H | 11 (0.23) | 10 (0.21) | 1 (0.45) |  |
| Isoniazid - 9H | 46 (0.94) | 46 (0.99) | 0 (0.00) |  |
| Rifampicin - 4R | 428 (8.76) | 415 (8.89) | 13 (5.88) |  |
| Rifapentine + Isoniazid - 3HP | 2470 (50.5) | 2353 (50.4) | 117 (52.9) |  |
| Number of doses taken of TPT (Median, IQR) | 28.0  [12.0;180] | 28.0  [12.0;180] | 12.0 [12.0;180] | 0.192 |
| Closure status of TPT: |  |  |  | <0.001 |
| Complete treatment | 3892 (79.6) | 3691 (79.1) | 201 (91.0) |  |
| Discontinuation of treatment | 898 (18.4) | 881 (18.9) | 17 (7.69) |  |
| Suspended due to adverse reaction | 52 (1.06) | 51 (1.09) | 1 (0.45) |  |
| Suspended due to clinical condition unfavorable to treatment | 10 (0.20) | 10 (0.21) | . |  |
| Active tuberculosis | 24 (0.49) | 24 (0.51) | . |  |
| Death | 9 (0.18) | 8 (0.17) | 1 (0.45) |  |
| Transferred to another country | 2 (0.04) | 1 (0.02) | 1 (0.45) |  |
|  |  |  |  |  |

Table note: aNonindigenous race includes White, black, brown or yellow. bP-value of the study population.

IL-TB, Information System for Latent Infection by *M. tuberculosis* from AM-BR, 2019-2023.

Abbreviations: PLHIV, person with human immunodeficiency virus; TB, tuberculosis; TBI, tuberculosis infection; IQR, interquartile range; TST, tuberculin skin test; IGRA, interferon gamma release assay; ART, antiretroviral therapy.
